# Supplementary material for: Genetic Association of the KLK4 Locus with Risk of Prostate Cancer
Source: PLoS One. 2012 Sep 6;7(9):e44520. doi: 10.1371/journal.pone.0044520 (PMC3435290; doi:10.1371/journal.pone.0044520)
Supplement: Table S2 — In silico function prediction of prostate cancer associated KLK4 gene variants. (XLSX) [file pone.0044520.s002.xlsx]

## Sheet: Sheet1
Table S2. In silico function prediction of prostate cancer associated KLK4 gene variants
KLK4 SNP	Alleles	MAF*	chr location	Location: long form	Location: ∆exon1 form	Predicted transcription factor binding site effects 1	Predicted protein2/miRNA effects3	Predicted HRE effects4	Predicted splicing effects5	Promoter Histone Mark6	Enhancer histone marks6	DNAse6	Conservation Score5	FS score7
rs268923	A/T	0.415	56114028	5' FR -8.2 kb	5' FR -9.6 kb	Alibaba: Oct-1 site GAINED. TFSEARCH: 2xPbx-1 sites GAINED, Matinspector: HSAL1 site LOST, FOXI1 site GAINED.		None			None		0	0.5 (altered TF binding site)
rs56112930	C/T	0.007	56112295	5' FR -6.5 kb	5' FR -7.8 kb	No effect on transcription factor binding sites (Alibaba, TFSEARCH).		None			None		0	NA
rs2569526	A/G	0.005	56106299	5' FR -500 bp	5' FR -1.8 kb OR 5' UTR of Aceview predicted v. Long form	No effect on transcription factor binding sites (Alibaba, TFSEARCH)		None			None	10 cell types	0	No functional information
rs198968	A/G	0.45	56105140	Intron 1	5' FR -750bp	Alibaba, TFSEARCH: no effect; Matinspector: 1x BTB/POZ site LOST		None		H1	None	14 cell types including LNCaP	0	No functional information
rs1654551	T/G	0.09	56104480	Exon 2 +3 bp (p.Ser22Ala)	5' UTR	TFSEARCH: GATA-2 site GAINED. Alibaba, Matinspector: no change.	splice variant with exon 1: In signal peptide: SignalP- wt cleaved 26/27, vt cleaved 21/22, 5 aa extra.	None	SF2ASF2 binding motif in sequence with A allele	H1	None	53 cell types including LNCaP	0	1 ( predicted to be benign by Polyphen, SIFT and SNPs3D; O-glycosylation predicted by OGPET
rs1654556	A/G	not done- in LD block	56101615	3' UTR	3' UTR	No effect on transcription factor binding sites (Alibaba, TFSEARCH)	miRanda - creates 4 diff miRNA bs (miR-1254,378,422a,661). No effect using miRbase and Patrocles.	None			None	26 cell types including LNCaP	0	No functional information
rs1701927	G/T	0.176	56100654	3' FR +750 bp	3' FR +750 bp	No effect on transcription factor binding sites (Alibaba, TFSEARCH)		None			None		0	No functional information
rs1701926	T/G	0.175	56100570	3' FR +850 bp	3' FR +850 bp	Alibaba: MyoD & NF-1 sites LOST, Elk-1 site GAINED. TFSEARCH: SRY site GAINED. Matinspector: Elf3 site LOST, Spi-B site GAINED.		None			None	Hepatocytes	0	No functional information
rs1090649	C/G	0.177	56098343	3' FR +3 kb	3' FR +3 kb	Alibaba: HNF-1C site LOST, TFSEARCH: retroviral TATA box GAINED. Matinspector: many changes.		None			None		0	No functional information
rs806019	C/G	0.177	56097794	3' FR +3.6 kb	3' FR +3.6 kb	Alibaba: GR site LOST, THRA site GAINED. TFSEARCH: HNF-4 site LOST, Matinspector: ARE site LOST, SOX2 site LOSTand ZNF83 site GAINED.		None			None	Hepatocytes	0	No functional information
MAF= Minor Allele frequency; UTR= Untranslated region; FR= upstream or downstream of the gene coding region 1Alibaba (http://labmom.com/link/alibaba_2_1_tf_binding_prediction), TFsearch (http://www.cbrc.jp/research/db/TFSEARCH.html) and MatInspector (http://www.genomatix.de/online_help/help_matinspector/matinspector_help.html) were used to predict the transcription factor binding sites; 2The prog…
